# Supplementary material for: Flattop regulates basal body docking and positioning in mono- and multiciliated cells
Source: PubMed Central journal article supplement (PMC4221739; doi:10.7554/elife.03842), 2014-10-08
Supplement: elife03842s001.pdf [file elife03842s001.pdf]

Gegg et al. Figure 1-source data 1  
Mendelian ratio of Fltp intercrosses on different backgrounds

A

| Fltp on C57Bl6/6NCrl background G5-6 |                            |                              |                             |      |
|--------------------------------------|----------------------------|------------------------------|-----------------------------|------|
|                                      | <i>Fltp</i> <sup>+/+</sup> | <i>Fltp</i> <sup>ZV/ZV</sup> | <i>Fltp</i> <sup>ZV/+</sup> |      |
| total                                | 162                        | 121                          | 279                         | 562  |
| percentage                           | 28.8%                      | 21.5%                        | 49.6%                       | 100% |

B

| Fltp on 129S6/SvEvTac background G3-4 |                            |                              |                             |      |
|---------------------------------------|----------------------------|------------------------------|-----------------------------|------|
|                                       | <i>Fltp</i> <sup>+/+</sup> | <i>Fltp</i> <sup>ZV/ZV</sup> | <i>Fltp</i> <sup>ZV/+</sup> |      |
| total                                 | 113                        | 74                           | 176                         | 363  |
| percentage                            | 31.1%                      | 20.4%                        | 48.5%                       | 100% |

C

| Fltp on CD1 background G2-3 |                            |                              |                             |      |
|-----------------------------|----------------------------|------------------------------|-----------------------------|------|
|                             | <i>Fltp</i> <sup>+/+</sup> | <i>Fltp</i> <sup>ZV/ZV</sup> | <i>Fltp</i> <sup>ZV/+</sup> |      |
| total                       | 49                         | 45                           | 81                          | 175  |
| percentage                  | 28.0%                      | 25.7%                        | 46.3%                       | 100% |
